# Supplementary material for: Rare Variants of Putative Candidate Genes Associated With Sporadic Meniere's Disease in East Asian Population
Source: Front Neurol. 2020 Jan 22;10:1424. doi: 10.3389/fneur.2019.01424 (PMC6987317; doi:10.3389/fneur.2019.01424)
Supplement: Supplementary file 2 [file Table_2.XLSX]

## Sheet: Sheet1
Data/Sample	CapKit	Total reads	Total yield (bp)	Average read length (bp)	Target regions (bp)	Average throughput depth of target regions (X)	Initial mappable reads (mapped to human genome)	% Initial mappable reads	Non-redundant reads	% Non-redundant reads	On-target reads	% On-target reads	% Coverage of target regions (more than 1X)	Number of on-target genotypes (more than 1X)	% Coverage of target regions (more than 10X)	Number of on-target genotypes (more than 10X)	% Coverage of target regions (more than 20X)	Number of on-target genotypes (more than 20X)	Mean depth of target regions (X)
P-1	SureSelect Custom	16848588	1,701,707,388	101.0	343,098	4959.8	16828351	99.8	15,516,420	92.2	8,766,740	56.4	99.5	341,657	99.4	341,183	99.3	340,966	1898.1
P-2	SureSelect Custom	13766426	1,390,409,026	101.0	343,098	4052.5	13687123	99.4	11,640,259	85.0	5,747,327	49.3	99.5	341,670	99.4	341,357	99.4	341,103	1235.3
P-3	SureSelect Custom	12836380	1,296,474,380	101.0	343,098	3778.7	12762222	99.4	11,521,030	90.2	5,977,630	51.8	99.5	341,597	99.4	341,142	99.3	340,952	1291.9
P-4	SureSelect Custom	13578760	1,371,454,760	101.0	343,098	3997.2	13485878	99.3	11,280,626	83.6	5,470,470	48.4	99.6	341,736	99.4	341,297	99.4	341,079	1174.1
P-5	SureSelect Custom	13669224	1,380,591,624	101.0	343,098	4023.8	13603156	99.5	11,717,228	86.1	5,882,956	50.2	99.6	341,739	99.5	341,391	99.4	341,220	1272.3
P-6	SureSelect Custom	12919380	1,304,857,380	101.0	343,098	3803.1	12847357	99.4	11,526,920	89.7	6,064,238	52.6	99.5	341,630	99.4	341,319	99.4	341,055	1307
P-7	SureSelect Custom	13274926	1,340,767,526	101.0	343,098	3907.8	13263292	99.9	12,520,503	94.3	5,378,359	42.9	99.5	341,709	99.4	341,042	99.2	340,671	1167.8
P-8	SureSelect Custom	12995458	1,312,541,258	101.0	343,098	3825.5	12924284	99.4	11,561,367	89.4	5,978,551	51.7	99.6	341,876	99.4	341,343	99.4	341,106	1290.1
P-9	SureSelect Custom	14455192	1,459,974,392	101.0	343,098	4255.2	14358406	99.3	7,248,025	50.4	2,274,939	31.3	99.6	341,897	99.5	341,440	99.4	341,309	464.3
P-10	SureSelect Custom	17532660	1,770,798,660	101.0	343,098	5161.2	17513101	99.8	16,065,333	91.7	9,247,461	57.5	99.5	341,654	99.4	341,329	99.4	341,106	2006.1
P-11	SureSelect Custom	13220074	1,335,227,474	101.0	343,098	3891.6	13143873	99.4	11,601,660	88.2	6,130,198	52.8	99.5	341,724	99.4	341,337	99.4	341,122	1329.3
P-12	SureSelect Custom	17091846	1,726,276,446	101.0	343,098	5031.4	17071628	99.8	15,691,457	91.9	8,996,518	57.3	99.6	341,783	99.4	341,257	99.4	341,089	1954.7
P-13	SureSelect Custom	17102248	1,727,327,048	101.0	343,098	5034.5	17077598	99.8	15,766,686	92.3	8,897,486	56.4	99.6	341,783	99.4	341,363	99.4	341,109	1930.1
P-14	SureSelect Custom	13641432	1,377,784,632	101.0	343,098	4015.7	13559090	99.3	11,883,682	87.6	5,844,639	49.1	99.6	341,728	99.4	341,304	99.4	341,078	1264.8
P-15	SureSelect Custom	16807694	1,697,577,094	101.0	343,098	4947.7	16787844	99.8	15,529,771	92.5	8,539,304	54.9	99.6	341,806	99.4	341,329	99.4	341,129	1851.6
P-16	SureSelect Custom	16811134	1,697,924,534	101.0	343,098	4948.8	16790891	99.8	15,523,688	92.4	8,198,890	52.8	99.6	341,789	99.5	341,400	99.4	341,262	1769.1
P-17	SureSelect Custom	13665668	1,380,232,468	101.0	343,098	4022.8	13567046	99.2	12,314,755	90.7	6,029,622	48.9	99.5	341,611	99.4	341,216	99.3	340,990	1303.3
P-18	SureSelect Custom	13142502	1,327,392,702	101.0	343,098	3868.8	13088795	99.5	11,388,785	87.0	5,888,445	51.7	99.6	341,883	99.4	341,330	99.4	341,076	1276.5
P-19	SureSelect Custom	12638832	1,276,522,032	101.0	343,098	3720.5	12578862	99.5	11,465,558	91.1	5,931,145	51.7	99.5	341,720	99.4	341,368	99.4	341,094	1279.2
P-20	SureSelect Custom	17694542	1,787,148,742	101.0	343,098	5208.8	17674364	99.8	16,288,070	92.1	8,879,231	54.5	99.5	341,714	99.5	341,417	99.4	341,280	1920.7
P-21	SureSelect Custom	13048858	1,317,934,658	101.0	343,098	3841.2	12972145	99.4	11,256,483	86.7	5,599,548	49.7	99.5	341,691	99.4	341,270	99.4	341,078	1206.7
P-22	SureSelect Custom	13304090	1,343,713,090	101.0	343,098	3916.4	13235389	99.4	11,894,137	89.8	6,361,778	53.4	99.5	341,680	99.4	341,256	99.4	341,102	1374.3
P-23	SureSelect Custom	13031898	1,316,221,698	101.0	343,098	3836.2	12961153	99.4	11,971,493	92.3	6,194,443	51.7	99.6	341,974	99.4	341,301	99.3	340,997	1335.4
P-24	SureSelect Custom	13022730	1,315,295,730	101.0	343,098	3833.5	12948597	99.4	11,722,347	90.5	6,106,801	52	99.6	341,767	99.4	341,356	99.4	341,077	1316.3
P-25	SureSelect Custom	13201748	1,333,376,548	101.0	343,098	3886.2	13147119	99.5	11,756,674	89.4	6,276,350	53.3	99.6	341,785	99.4	341,221	99.4	341,060	1354.3
P-26	SureSelect Custom	14297272	1,444,024,472	101.0	343,098	4208.7	14284140	99.9	13,344,618	93.4	6,010,584	45	99.5	341,572	99.3	340,951	99.2	340,635	1314.4
P-27	SureSelect Custom	13092928	1,322,385,728	101.0	343,098	3854.2	13029127	99.5	11,837,783	90.8	6,214,196	52.4	99.6	341,772	99.4	341,231	99.3	340,946	1340.1
P-28	SureSelect Custom	13703316	1,384,034,916	101.0	343,098	4033.9	13629266	99.4	11,943,220	87.6	6,049,052	50.6	99.6	341,875	99.4	341,211	99.3	341,029	1300.3
P-29	SureSelect Custom	16653448	1,681,998,248	101.0	343,098	4902.3	16633873	99.8	15,513,169	93.2	8,329,243	53.6	99.6	341,956	99.4	341,265	99.3	341,010	1800.3
P-30	SureSelect Custom	13089384	1,322,027,784	101.0	343,098	3853.2	13009053	99.3	10,861,307	83.4	5,341,081	49.1	99.6	341,773	99.4	341,211	99.4	341,046	1147.5
P-31	SureSelect Custom	18117516	1,829,869,116	101.0	343,098	5333.3	18089128	99.8	16,610,142	91.8	9,072,186	54.6	99.5	341,715	99.4	341,372	99.4	341,076	1960.8
P-32	SureSelect Custom	12766180	1,289,384,180	101.0	343,098	3758.0	12721666	99.6	11,511,504	90.4	5,852,868	50.8	99.5	341,622	99.4	341,173	99.3	340,953	1264.9
P-33	SureSelect Custom	12708986	1,283,607,586	101.0	343,098	3741.2	12653544	99.5	11,385,515	89.9	5,891,853	51.7	99.5	341,609	99.4	341,240	99.3	341,010	1269.4
P-34	SureSelect Custom	13920452	1,405,965,652	101.0	343,098	4097.8	13846092	99.4	10,741,143	77.5	5,087,667	47.3	99.5	341,659	99.4	341,315	99.4	341,148	1080
P-35	SureSelect Custom	13575784	1,371,154,184	101.0	343,098	3996.3	13515930	99.5	11,620,628	85.9	6,016,338	51.7	99.5	341,615	99.4	341,343	99.4	341,119	1302.5
P-36	SureSelect Custom	18388292	1,857,217,492	101.0	343,098	5413.0	18365795	99.8	16,442,227	89.5	9,622,881	58.5	99.6	341,742	99.4	341,291	99.4	341,164	2095.5
P-37	SureSelect Custom	13148326	1,327,980,926	101.0	343,098	3870.5	13085927	99.5	11,421,764	87.2	5,737,178	50.2	99.5	341,639	99.4	341,317	99.4	341,110	1233.8
P-38	SureSelect Custom	13574686	1,371,043,286	101.0	343,098	3996.0	13502898	99.4	11,576,242	85.7	6,248,842	53.9	99.5	341,637	99.4	341,168	99.3	340,927	1352.4
P-39	SureSelect Custom	12527342	1,265,261,542	101.0	343,098	3687.7	12377057	98.8	10,969,714	88.6	5,495,379	50	99.5	341,642	99.4	341,151	99.3	340,847	1185.3
P-40	SureSelect Custom	14964256	1,511,389,856	101.0	343,098	4405.1	14946777	99.8	13,755,809	92.0	5,758,336	41.8	99.6	341,797	99.4	341,101	99.3	340,710	1256.8
P-41	SureSelect Custom	17747240	1,792,471,240	101.0	343,098	5224.3	17724443	99.8	16,397,357	92.5	9,359,884	57	99.6	341,783	99.4	341,325	99.4	341,162	2026.1
P-42	SureSelect Custom	12055438	1,217,599,238	101.0	343,098	3548.8	12005109	99.5	11,065,119	92.1	5,484,131	49.5	99.5	341,710	99.4	341,135	99.3	340,902	1187.1
P-43	SureSelect Custom	12178288	1,230,007,088	101.0	343,098	3585.0	12117265	99.4	10,872,645	89.7	5,741,371	52.8	99.5	341,668	99.4	341,254	99.4	341,054	1242.9
P-44	SureSelect Custom	12581602	1,270,741,802	101.0	343,098	3703.7	12502181	99.3	10,289,018	82.2	4,864,401	47.2	99.5	341,698	99.4	341,333	99.4	341,069	1038.8
P-45	SureSelect Custom	12376464	1,250,022,864	101.0	343,098	3643.3	12315611	99.5	11,013,458	89.4	5,873,634	53.3	99.6	341,755	99.4	341,298	99.3	340,958	1275.8
P-46	SureSelect Custom	12638656	1,276,504,256	101.0	343,098	3720.5	12557116	99.3	11,106,560	88.4	5,845,996	52.6	99.5	341,631	99.4	341,163	99.3	340,932	1261
P-47	SureSelect Custom	12464588	1,258,923,388	101.0	343,098	3669.2	12402450	99.5	10,988,956	88.6	5,840,586	53.1	99.5	341,652	99.4	341,328	99.4	341,117	1257.1
P-48	SureSelect Custom	12481662	1,260,647,862	101.0	343,098	3674.3	12396732	99.3	10,807,950	87.1	5,597,331	51.7	99.6	341,751	99.4	341,316	99.4	341,135	1208.3
P-49	SureSelect Custom	17125414	1,729,666,814	101.0	343,098	5041.3	17104419	99.8	15,700,692	91.7	8,736,860	55.6	99.6	341,770	99.4	341,367	99.4	341,150	1890.6
P-50	SureSelect Custom	13186858	1,331,872,658	101.0	343,098	3881.9	13115776	99.4	11,642,484	88.7	6,086,931	52.2	99.5	341,568	99.4	341,158	99.3	340,956	1318.2
P-51	SureSelect Custom	13515480	1,365,063,480	101.0	343,098	3978.6	13448539	99.5	8,936,130	66.4	3,971,837	44.4	99.5	341,637	99.4	341,350	99.4	341,102	837.1
P-52	SureSelect Custom	13255774	1,338,833,174	101.0	343,098	3902.1	13198174	99.5	8,897,883	67.4	4,013,560	45.1	99.5	341,483	99.4	341,238	99.4	341,105	849.3
P-53	SureSelect Custom	13213518	1,334,565,318	101.0	343,098	3889.7	13133861	99.3	11,734,901	89.3	5,989,503	51	99.5	341,598	99.4	341,123	99.3	340,839	1300.1
P-54	SureSelect Custom	13122104	1,325,332,504	101.0	343,098	3862.8	13039691	99.3	11,583,327	88.8	5,952,538	51.3	99.6	341,792	99.4	341,155	99.3	340,917	1283.5
P-55	SureSelect Custom	13243792	1,337,622,992	101.0	343,098	3898.6	13174419	99.4	11,132,165	84.4	5,543,581	49.7	99.6	341,757	99.4	341,270	99.3	341,033	1190.1
P-56	SureSelect Custom	12591996	1,271,791,596	101.0	343,098	3706.7	12526593	99.4	11,187,335	89.3	6,003,348	53.6	99.5	341,603	99.4	341,209	99.3	341,008	1301.4
P-57	SureSelect Custom	18523190	1,870,842,190	101.0	343,098	5452.7	18495483	99.8	16,589,281	89.6	9,057,317	54.5	99.5	341,710	99.4	341,376	99.4	341,204	1960.9
P-58	SureSelect Custom	12781296	1,290,910,896	101.0	343,098	3762.5	12710973	99.4	11,367,956	89.4	5,891,023	51.8	99.5	341,711	99.4	341,116	99.3	340,916	1267
P-59	SureSelect Custom	13036322	1,316,668,522	101.0	343,098	3837.5	12959144	99.4	11,886,203	91.7	5,706,794	48	99.6	341,751	99.4	341,164	99.3	340,960	1237
P-60	SureSelect Custom	18285982	1,846,884,182	101.0	343,098	5382.9	18263022	99.8	16,703,496	91.4	9,373,203	56.1	99.5	341,668	99.4	341,373	99.4	341,145	2031.2
P-61	SureSelect Custom	13574664	1,371,041,064	101.0	343,098	3996.0	13501346	99.4	11,653,640	86.3	6,215,455	53.3	99.5	341,576	99.4	341,192	99.3	340,965	1341.2
P-62	SureSelect Custom	14192270	1,433,419,270	101.0	343,098	4177.8	14181140	99.9	13,183,065	92.9	6,560,353	49.7	99.5	341,604	99.4	341,086	99.3	340,819	1431.9
P-63	SureSelect Custom	20637736	2084411336	101	343098	6075.2	20555830	99.6	19197171	93.3	10039453	52.2	99.5	341664	99.4	341260	99.3	341033	2158.4
P-64	SureSelect Custom	21125236	2133648836	101	343098	6218.7	21090030	99.8	19338893	91.6	9292067	48	99.6	341940	99.4	341382	99.4	341085	2011.5
P-65	SureSelect Custom	19575468	1977122268	101	343098	5762.5	19547115	99.8	17935591	91.7	9400003	52.4	99.6	341754	99.5	341442	99.4	341266	2032.8
P-66	SureSelect Custom	14819204	1496739604	101	343098	4362.4	14798000	99.8	13797877	93.2	7633843	55.3	99.5	341677	99.4	341322	99.4	341085	1657.4
P-67	SureSelect Custom	21187994	2139987394	101	343098	6237.2	21151002	99.8	19226389	90.9	10240978	53.2	99.6	341799	99.4	341325	99.4	341105	2218.6
P-68	SureSelect Custom	19995602	2019555802	101	343098	5886.2	19935679	99.7	18664629	93.6	9574645	51.2	99.6	341778	99.4	341300	99.4	341172	2058.3
